# Supplementary material for: Neural assemblies uncovered by generative modeling explain whole-brain activity statistics and reflect structural connectivity
Source: eLife journal article supplement (doi:10.7554/elife.83139), 2023-01-17

**A Functional connectivity (covariance, average of 8 fish)**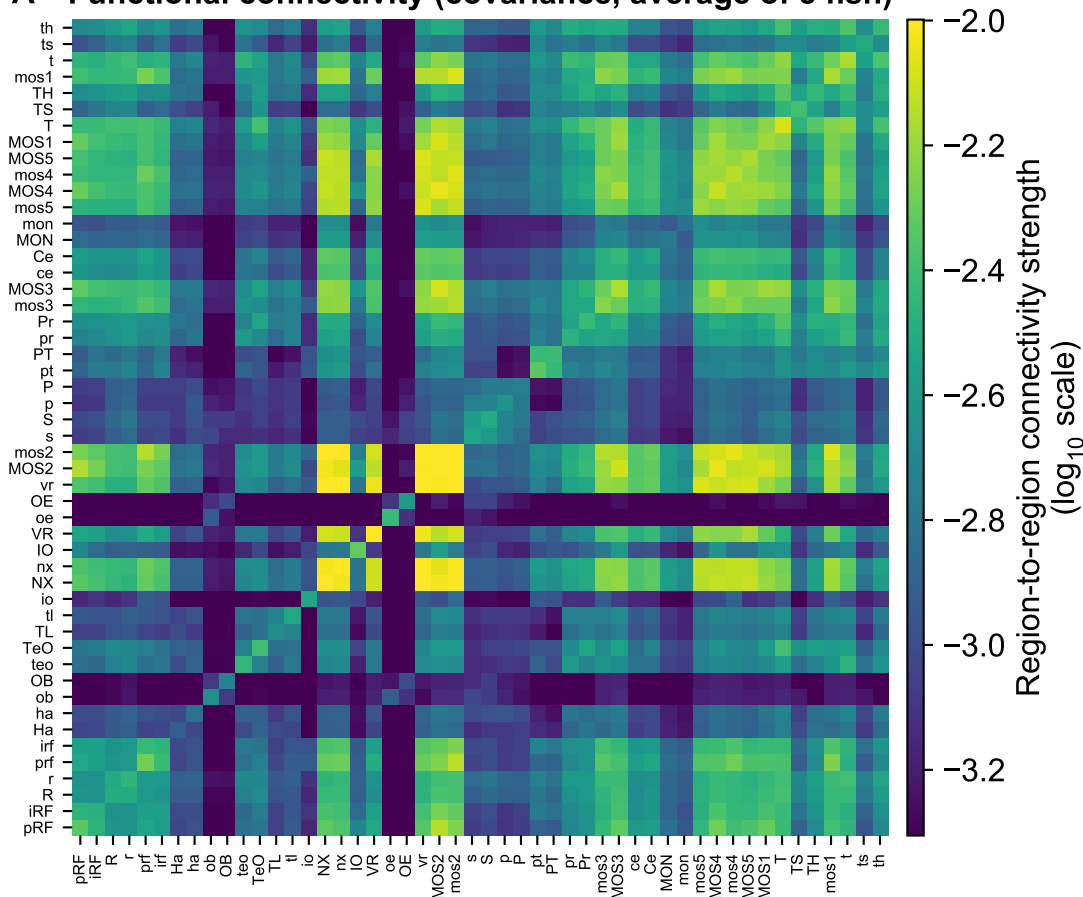**B Functional connectivity (correlation, average of 8 fish)**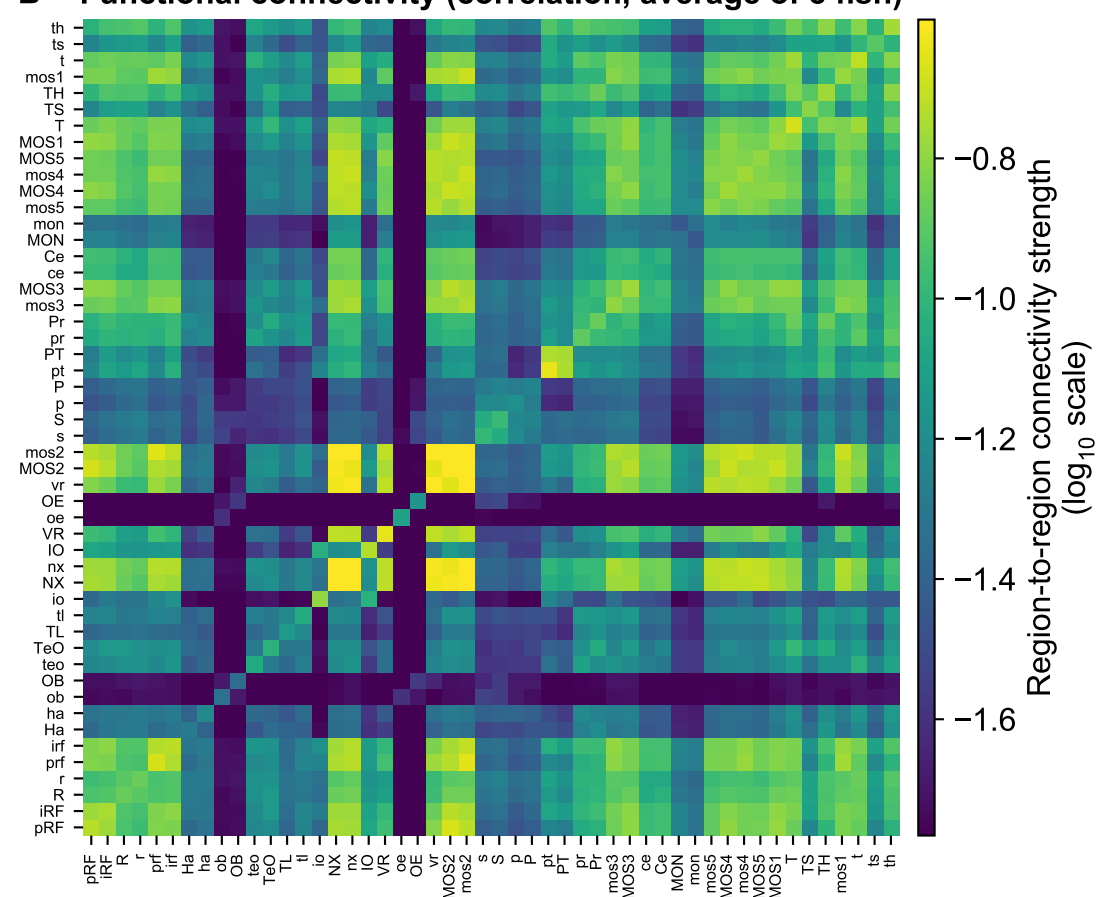**C covariance vs structural connectivity**

$$r_s = 0.18, P < 10^{-5}$$

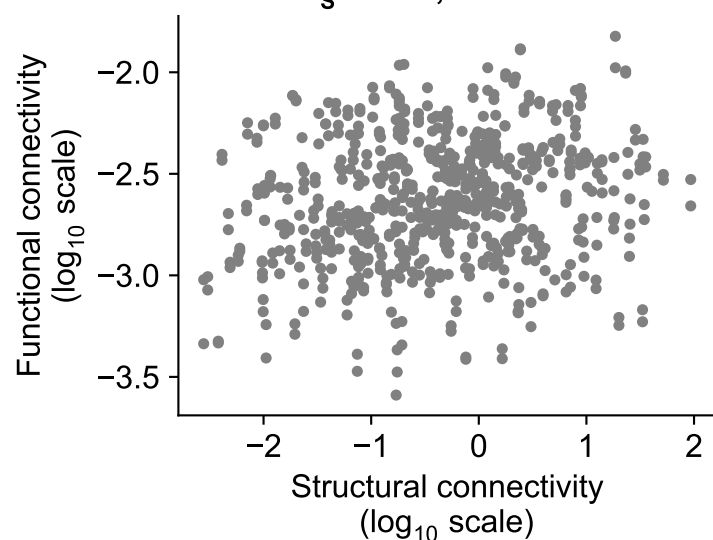**D correlation vs structural connectivity**

$$r_s = 0.26, P < 10^{-11}$$

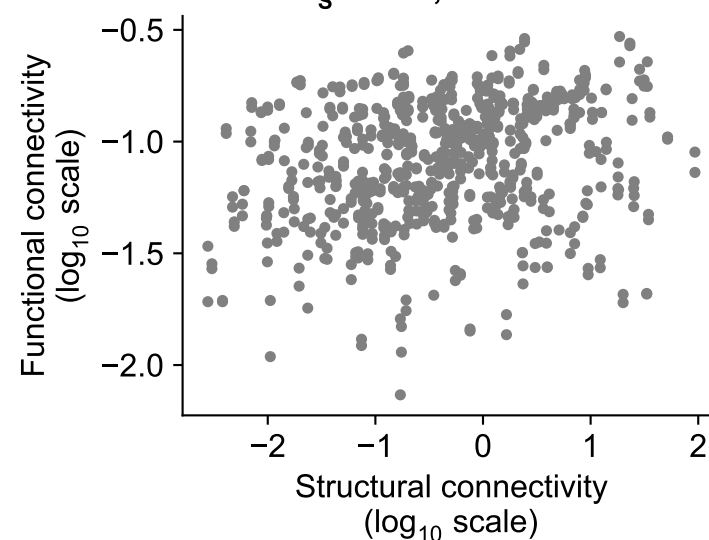**E covariance functional connectivity distributions**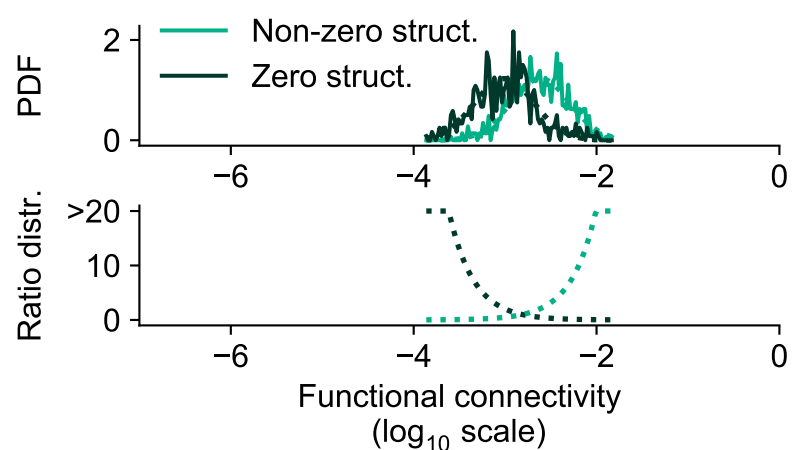**F correlation functional connectivity distributions**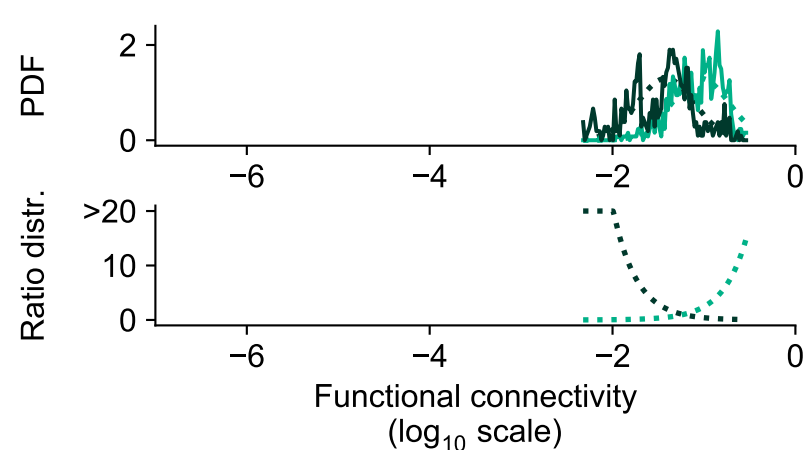

Supplement: supp [file elife-83139-supp-v1.zip]
