# Supplementary material for: Neural assemblies uncovered by generative modeling explain whole-brain activity statistics and reflect structural connectivity
Source: eLife journal article supplement (doi:10.7554/elife.83139), 2023-01-17
Supplement: supp [file elife-83139-supp-v1.zip]

Archive with 12 entries (12 files):
- elife_poa_e83139_Video_1.mp4
- elife_poa_e83139_Figure_2_figure_supplement_1.pdf
- elife_poa_e83139_Figure_2_figure_supplement_2.pdf
- elife_poa_e83139_Figure_2_figure_supplement_3.pdf
- elife_poa_e83139_Figure_2_figure_supplement_4.pdf
- elife_poa_e83139_Figure_2_figure_supplement_5.pdf
- elife_poa_e83139_Figure_2_figure_supplement_6.pdf
- elife_poa_e83139_Figure_2_figure_supplement_7.pdf
- elife_poa_e83139_Figure_5_figure_supplement_1.pdf
- elife_poa_e83139_Figure_6_figure_supplement_1.pdf
- elife_poa_e83139_Supplementary_file_1.tex
- elife_poa_e83139_Supplementary_file_2.tex
