# Supplementary material for: Neural assemblies uncovered by generative modeling explain whole-brain activity statistics and reflect structural connectivity
Source: eLife journal article supplement (doi:10.7554/elife.83139), 2023-01-17

Fraction of neurons that are embedded in  $\geq$  number of assemblies  
Surface area is proportional to fraction of neurons

embedded in  
# of assemblies:

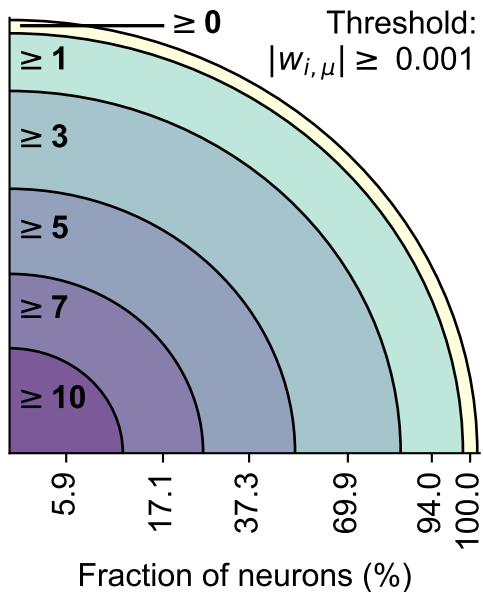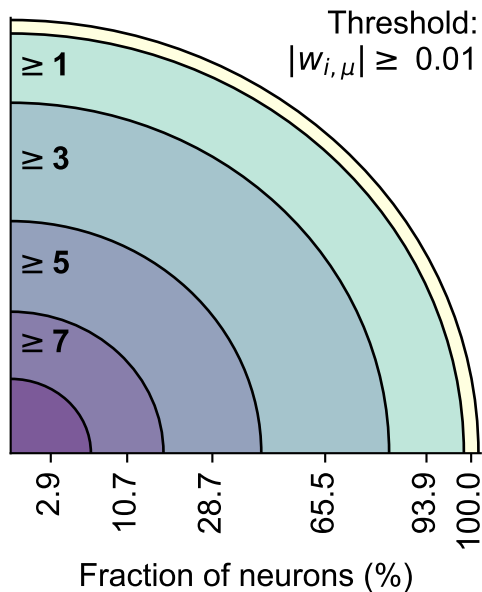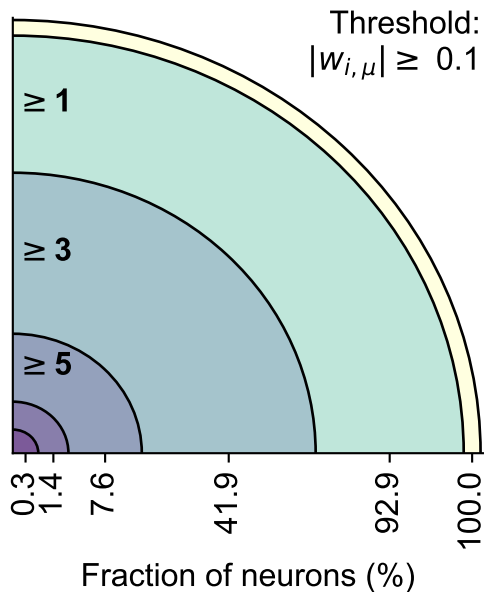

Supplement: supp [file elife-83139-supp-v1.zip › elife_poa_e83139_Figure_2_figure_supplement_4.pdf]
