# Supplementary material for: Neural assemblies uncovered by generative modeling explain whole-brain activity statistics and reflect structural connectivity
Source: eLife journal article supplement (doi:10.7554/elife.83139), 2023-01-17
Supplement: supp [file elife-83139-supp-v1.zip › elife_poa_e83139_Supplementary_file_1.tex]

\begin{tabular}{ll|ll}
\toprule
Abbreviation &                           Full name & Abbreviation  &                              Full name  \\
\midrule
          th &                       Thalamus left &             s &                         Subpallium left \\
          ts &           Torus semicircularis left &          mos2 &                        MO stripe 2 left \\
           t &                      Tegmentum left &          MOS2 &                       MO stripe 2 right \\
        mos1 &                    MO stripe 1 left &            vr &                       Vagal region left \\
          TH &                      Thalamus right &            OE &              Olfactory epithelium right \\
          TS &          Torus semicircularis right &            oe &               Olfactory epithelium left \\
           T &                     Tegmentum right &            VR &                      Vagal region right \\
        MOS1 &                   MO stripe 1 right &            IO &                    Inferior olive right \\
        MOS5 &                   MO stripe 5 right &            nx &                Vagus motor neurons left \\
        mos4 &                    MO stripe 4 left &            NX &               Vagus motor neurons right \\
        MOS4 &                   MO stripe 4 right &            io &                     Inferior olive left \\
        mos5 &                    MO stripe 5 left &            tl &               Torus longitudinalis left \\
         mon &   Medial octavolateral nucleus left &            TL &              Torus longitudinalis right \\
         MON &  Medial octavolateral nucleus right &           TeO &                            Tectum right \\
          Ce &                    Cerebellum right &           teo &                             Tectum left \\
          ce &                     Cerebellum left &            OB &                    Olfactory bulb right \\
        MOS3 &                   MO stripe 3 right &            ob &                     Olfactory bulb left \\
        mos3 &                    MO stripe 3 left &            ha &                           Habenula left \\
          Pr &                     Pretectum right &            Ha &                          Habenula right \\
          pr &                      Pretectum left &           irf &   Intermediate reticular formation left \\
          PT &          Posterior tuberculum right &           prf &      Posterior reticular formation left \\
          pt &           Posterior tuberculum left &             r &                      Raphe nucleus left \\
           P &                       Pallium right &             R &                     Raphe nucleus right \\
           p &                        Pallium left &           iRF &  Intermediate reticular formation right \\
           S &                    Subpallium right &           pRF &     Posterior reticular formation right \\
\bottomrule
\end{tabular}
