# Supplementary material for: Neural assemblies uncovered by generative modeling explain whole-brain activity statistics and reflect structural connectivity
Source: eLife journal article supplement (doi:10.7554/elife.83139), 2023-01-17
Supplement: supp [file elife-83139-supp-v1.zip › elife_poa_e83139_Supplementary_file_2.tex]

\begin{tabular}{l|lllllllll}
\toprule
Algorithm                             & PCA                        & ICA                        &          k-means           & NNMF                       & VAE                        & GLM                        & BM                         & cRBM                       \\ \toprule
Learns probability distribution       & {\color[HTML]{9A0000} No}  & {\color[HTML]{9A0000} No}  & {\color[HTML]{9A0000} No}  & {\color[HTML]{9A0000} No}  & {\color[HTML]{036400} Yes} & {\color[HTML]{9A0000} No}  & {\color[HTML]{036400} Yes} & {\color[HTML]{036400} Yes} \\ \hline
Learns low-dimensional representation & {\color[HTML]{036400} Yes} & {\color[HTML]{036400} Yes} & {\color[HTML]{9A0000} No}  & {\color[HTML]{036400} Yes} & {\color[HTML]{036400} Yes} & {\color[HTML]{9A0000} No}  & {\color[HTML]{9A0000} No}  & {\color[HTML]{036400} Yes} \\ \hline
Learns functional connectivity        & {\color[HTML]{9A0000} No}  & {\color[HTML]{9A0000} No}  & {\color[HTML]{9A0000} No}  & {\color[HTML]{9A0000} No}  & ?                          & {\color[HTML]{036400} Yes} & {\color[HTML]{036400} Yes} & {\color[HTML]{036400} Yes} \\ \hline
Allows inhibiting connections         & {\color[HTML]{036400} Yes} & {\color[HTML]{036400} Yes} & {\color[HTML]{9A0000} No}  & {\color[HTML]{9A0000} No}  & {\color[HTML]{036400} Yes} & {\color[HTML]{036400} Yes} & {\color[HTML]{036400} Yes} & {\color[HTML]{036400} Yes} \\ \hline
Scalable to large data sets           & {\color[HTML]{036400} Yes} & {\color[HTML]{036400} Yes} & {\color[HTML]{036400} Yes} & {\color[HTML]{036400} Yes} & {\color[HTML]{036400} Yes} & {\color[HTML]{9A0000} No}  & {\color[HTML]{9A0000} No}  & {\color[HTML]{036400} Yes} \\ \hline
Perturbation prediction               & {\color[HTML]{9A0000} No}  & {\color[HTML]{9A0000} No}  & {\color[HTML]{9A0000} No}  & {\color[HTML]{9A0000} No}  & ?                          & {\color[HTML]{9A0000} No}  & {\color[HTML]{036400} Yes} & {\color[HTML]{036400} Yes} \\ \hline
Can infer assemblies                  & {\color[HTML]{9A0000} No}  & {\color[HTML]{9A0000} No}  & {\color[HTML]{036400} Yes} & {\color[HTML]{036400} Yes} & {\color[HTML]{036400} Yes}                          & {\color[HTML]{9A0000} No}  & {\color[HTML]{9A0000} No}  & {\color[HTML]{036400} Yes} \\ \bottomrule
\end{tabular}
