# Supplementary material for: Neural assemblies uncovered by generative modeling explain whole-brain activity statistics and reflect structural connectivity
Source: eLife journal article supplement (doi:10.7554/elife.83139), 2023-01-17
Supplement: supp1 [file elife-83139-supp1-v2.pdf]

| Abbreviation | Full name                          | Abbreviation | Full name                              |
|--------------|------------------------------------|--------------|----------------------------------------|
| th           | Thalamus left                      | s            | Subpallium left                        |
| ts           | Torus semicircularis left          | mos2         | MO stripe 2 left                       |
| t            | Tegmentum left                     | MOS2         | MO stripe 2 right                      |
| mos1         | MO stripe 1 left                   | vr           | Vagal region left                      |
| TH           | Thalamus right                     | OE           | Olfactory epithelium right             |
| TS           | Torus semicircularis right         | oe           | Olfactory epithelium left              |
| T            | Tegmentum right                    | VR           | Vagal region right                     |
| MOS1         | MO stripe 1 right                  | IO           | Inferior olive right                   |
| MOS5         | MO stripe 5 right                  | nx           | Vagus motor neurons left               |
| mos4         | MO stripe 4 left                   | NX           | Vagus motor neurons right              |
| MOS4         | MO stripe 4 right                  | io           | Inferior olive left                    |
| mos5         | MO stripe 5 left                   | tl           | Torus longitudinalis left              |
| mon          | Medial octavolateral nucleus left  | TL           | Torus longitudinalis right             |
| MON          | Medial octavolateral nucleus right | TeO          | Tectum right                           |
| Ce           | Cerebellum right                   | teo          | Tectum left                            |
| ce           | Cerebellum left                    | OB           | Olfactory bulb right                   |
| MOS3         | MO stripe 3 right                  | ob           | Olfactory bulb left                    |
| mos3         | MO stripe 3 left                   | ha           | Habenula left                          |
| Pr           | Pretectum right                    | Ha           | Habenula right                         |
| pr           | Pretectum left                     | irf          | Intermediate reticular formation left  |
| PT           | Posterior tuberculum right         | prf          | Posterior reticular formation left     |
| pt           | Posterior tuberculum left          | r            | Raphe nucleus left                     |
| P            | Pallium right                      | R            | Raphe nucleus right                    |
| p            | Pallium left                       | iRF          | Intermediate reticular formation right |
| S            | Subpallium right                   | pRF          | Posterior reticular formation right    |
