# Supplementary material for: Neural assemblies uncovered by generative modeling explain whole-brain activity statistics and reflect structural connectivity
Source: eLife journal article supplement (doi:10.7554/elife.83139), 2023-01-17
Supplement: supp2 [file elife-83139-supp2-v2.pdf]

| Algorithm                             | PCA | ICA | k-means | NNMF | VAE | GLM | BM  | cRBM |
|---------------------------------------|-----|-----|---------|------|-----|-----|-----|------|
| Learns probability distribution       | No  | No  | No      | No   | Yes | No  | Yes | Yes  |
| Learns low-dimensional representation | Yes | Yes | No      | Yes  | Yes | No  | No  | Yes  |
| Learns functional connectivity        | No  | No  | No      | No   | ?   | Yes | Yes | Yes  |
| Allows inhibiting connections         | Yes | Yes | No      | No   | Yes | Yes | Yes | Yes  |
| Scalable to large data sets           | Yes | Yes | Yes     | Yes  | Yes | No  | No  | Yes  |
| Perturbation prediction               | No  | No  | No      | No   | ?   | No  | Yes | Yes  |
| Can infer assemblies                  | No  | No  | Yes     | Yes  | Yes | No  | No  | Yes  |
