# Supplementary figures and images for: Neural assemblies uncovered by generative modeling explain whole-brain activity statistics and reflect structural connectivity
Source: eLife journal article supplement (doi:10.7554/elife.83139), 2023-01-17

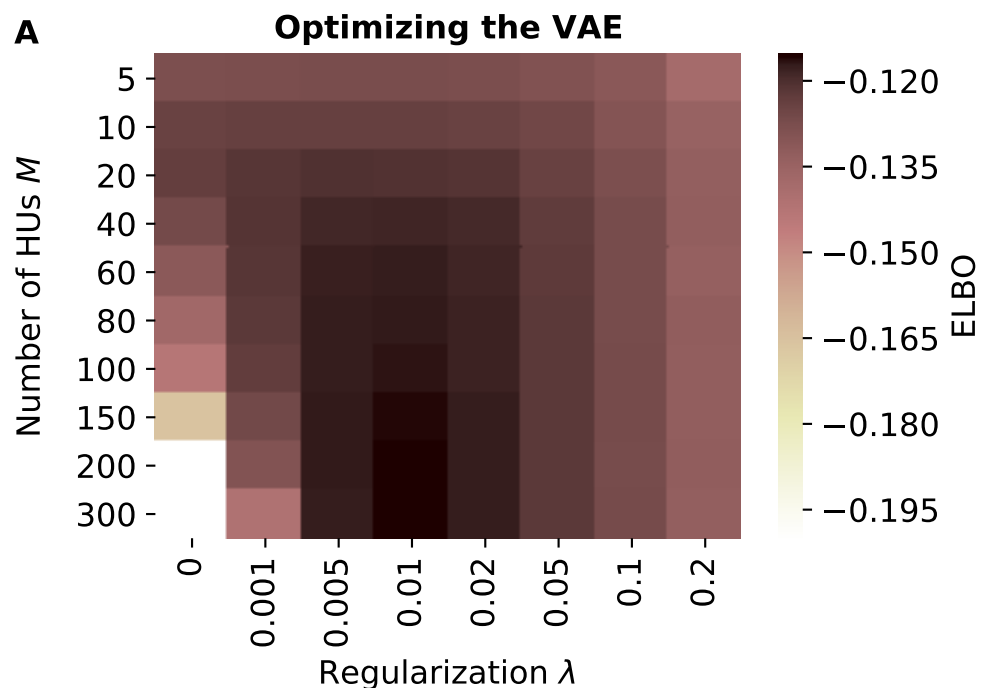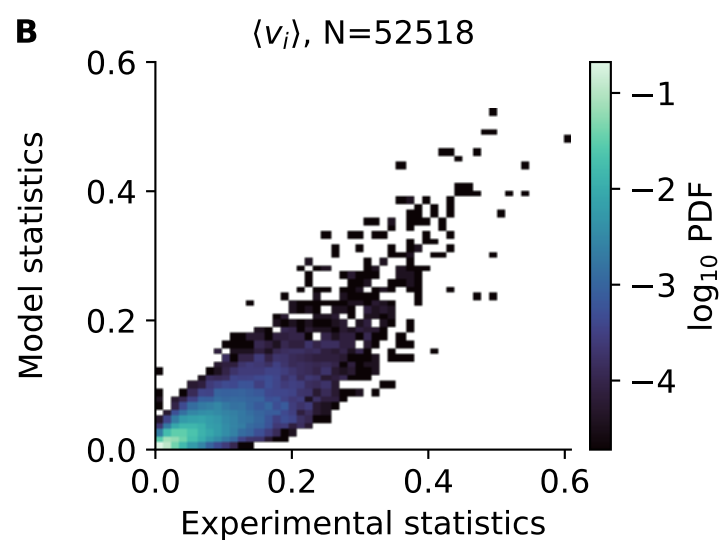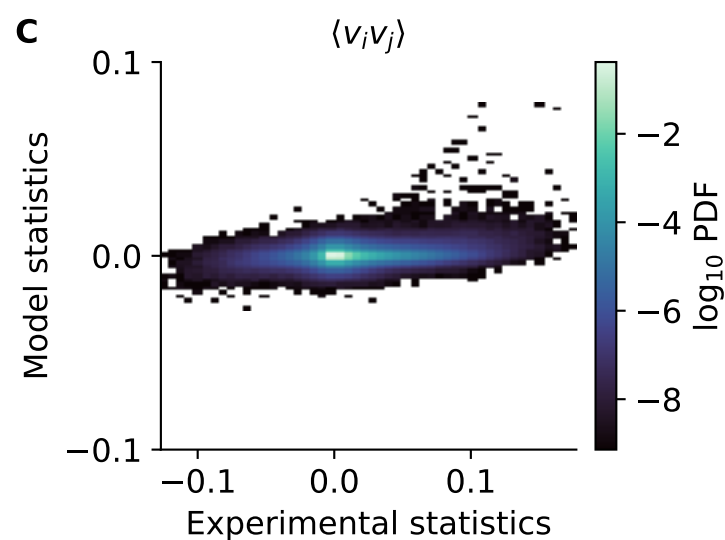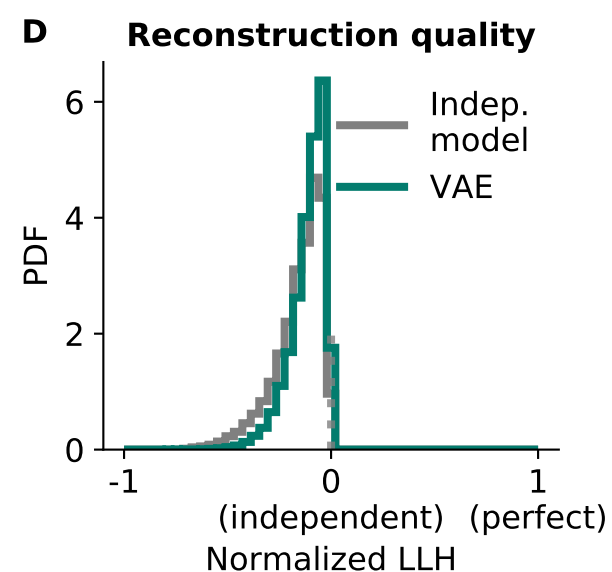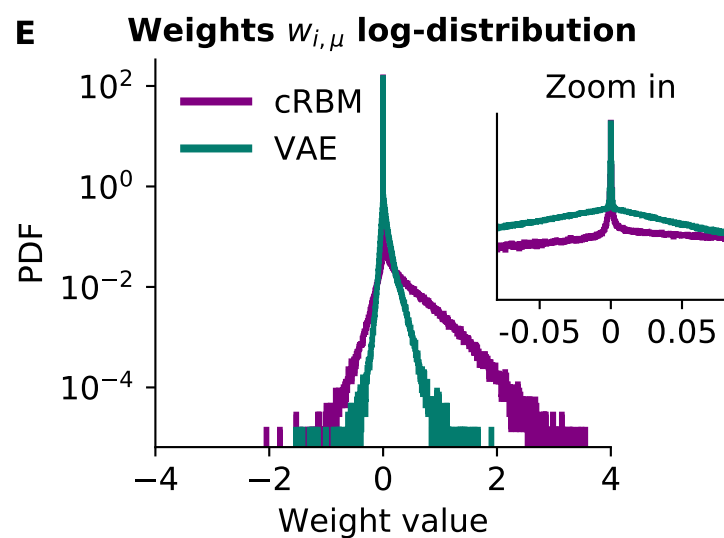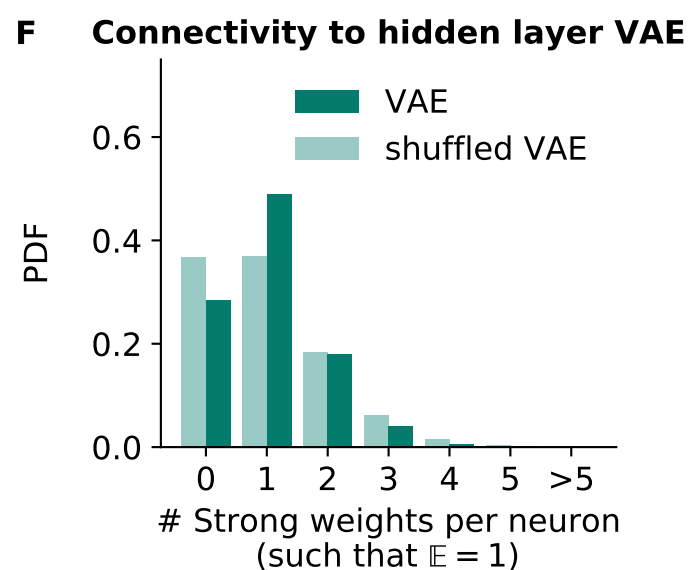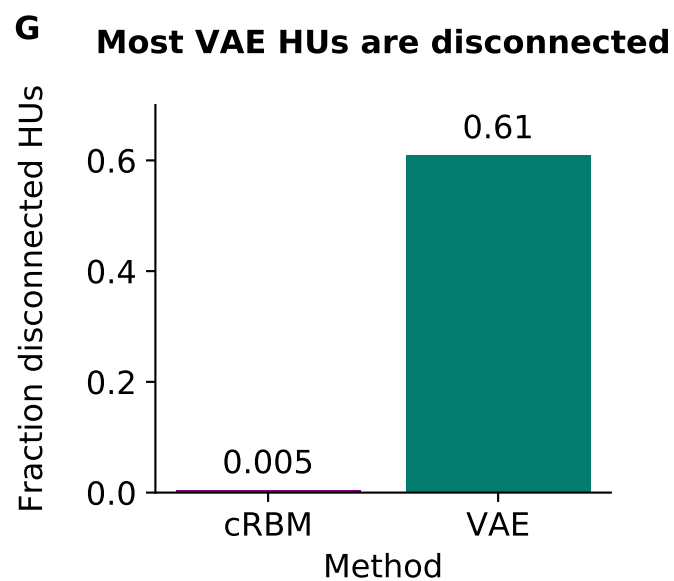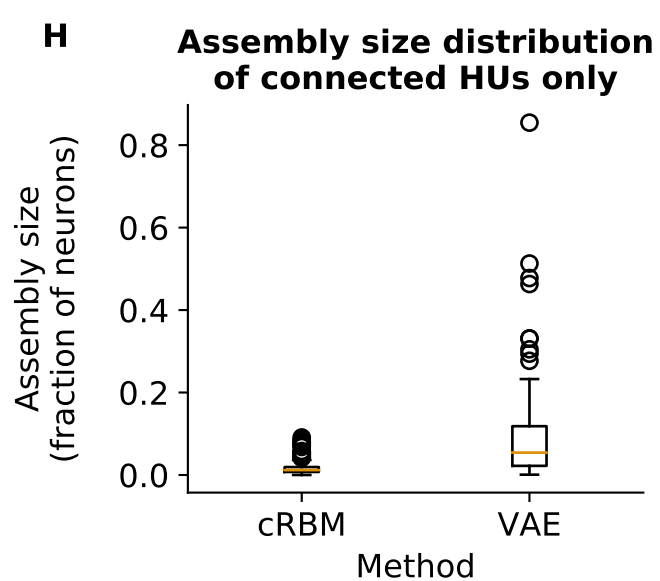

Supplement: supp [file elife-83139-supp-v1.zip]

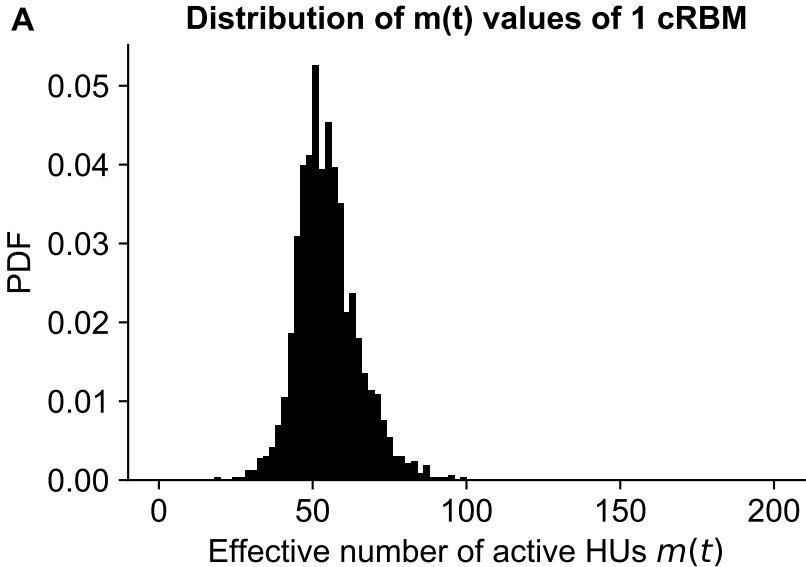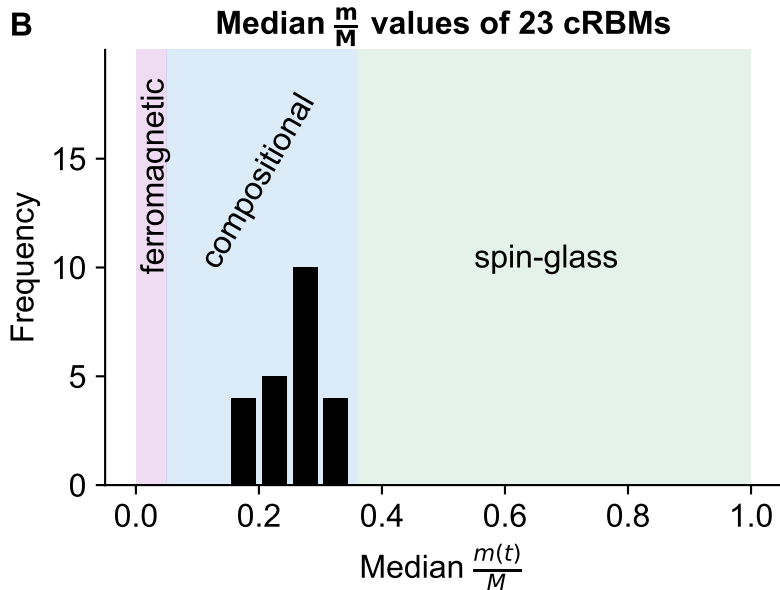

Supplement: supp [file elife-83139-supp-v1.zip]

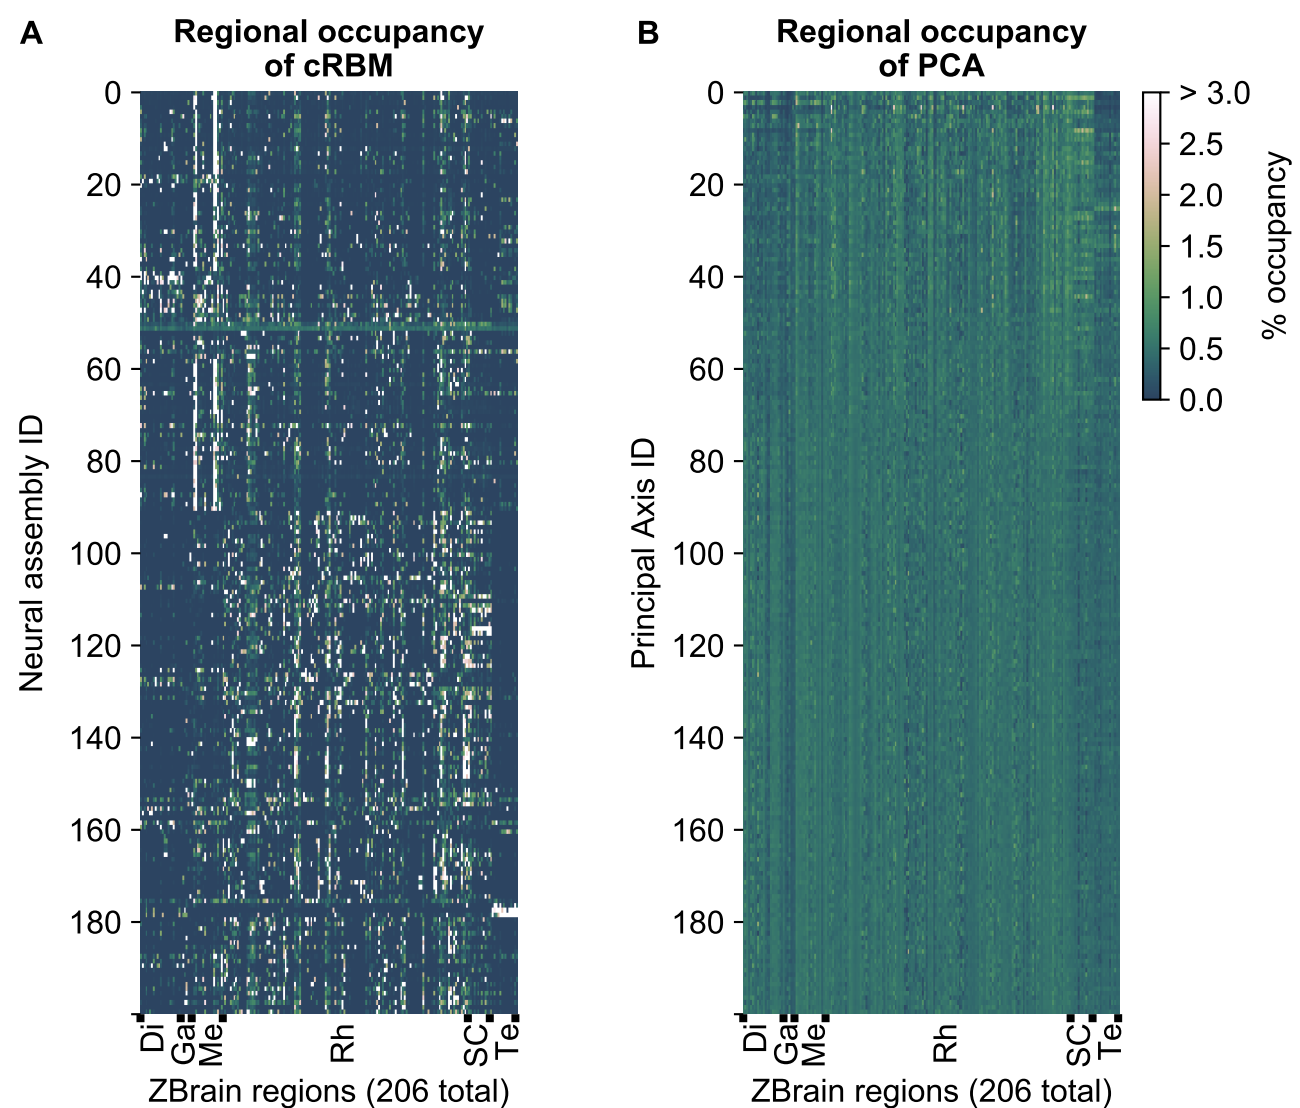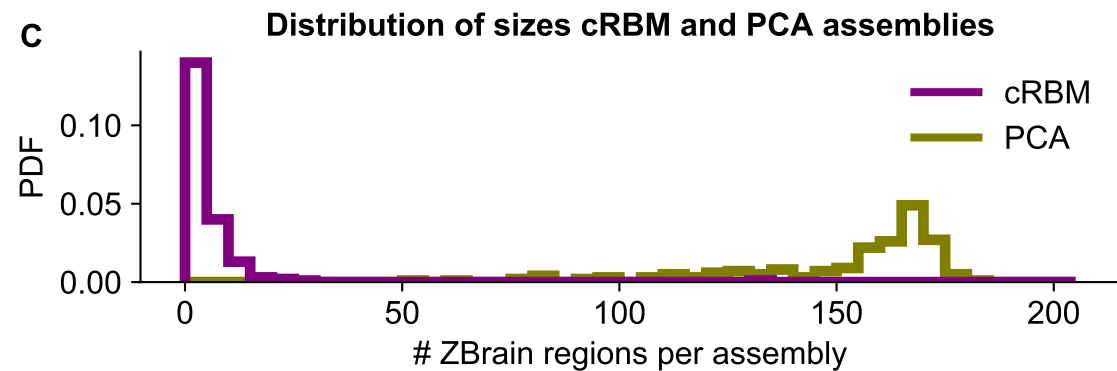

Supplement: supp [file elife-83139-supp-v1.zip]

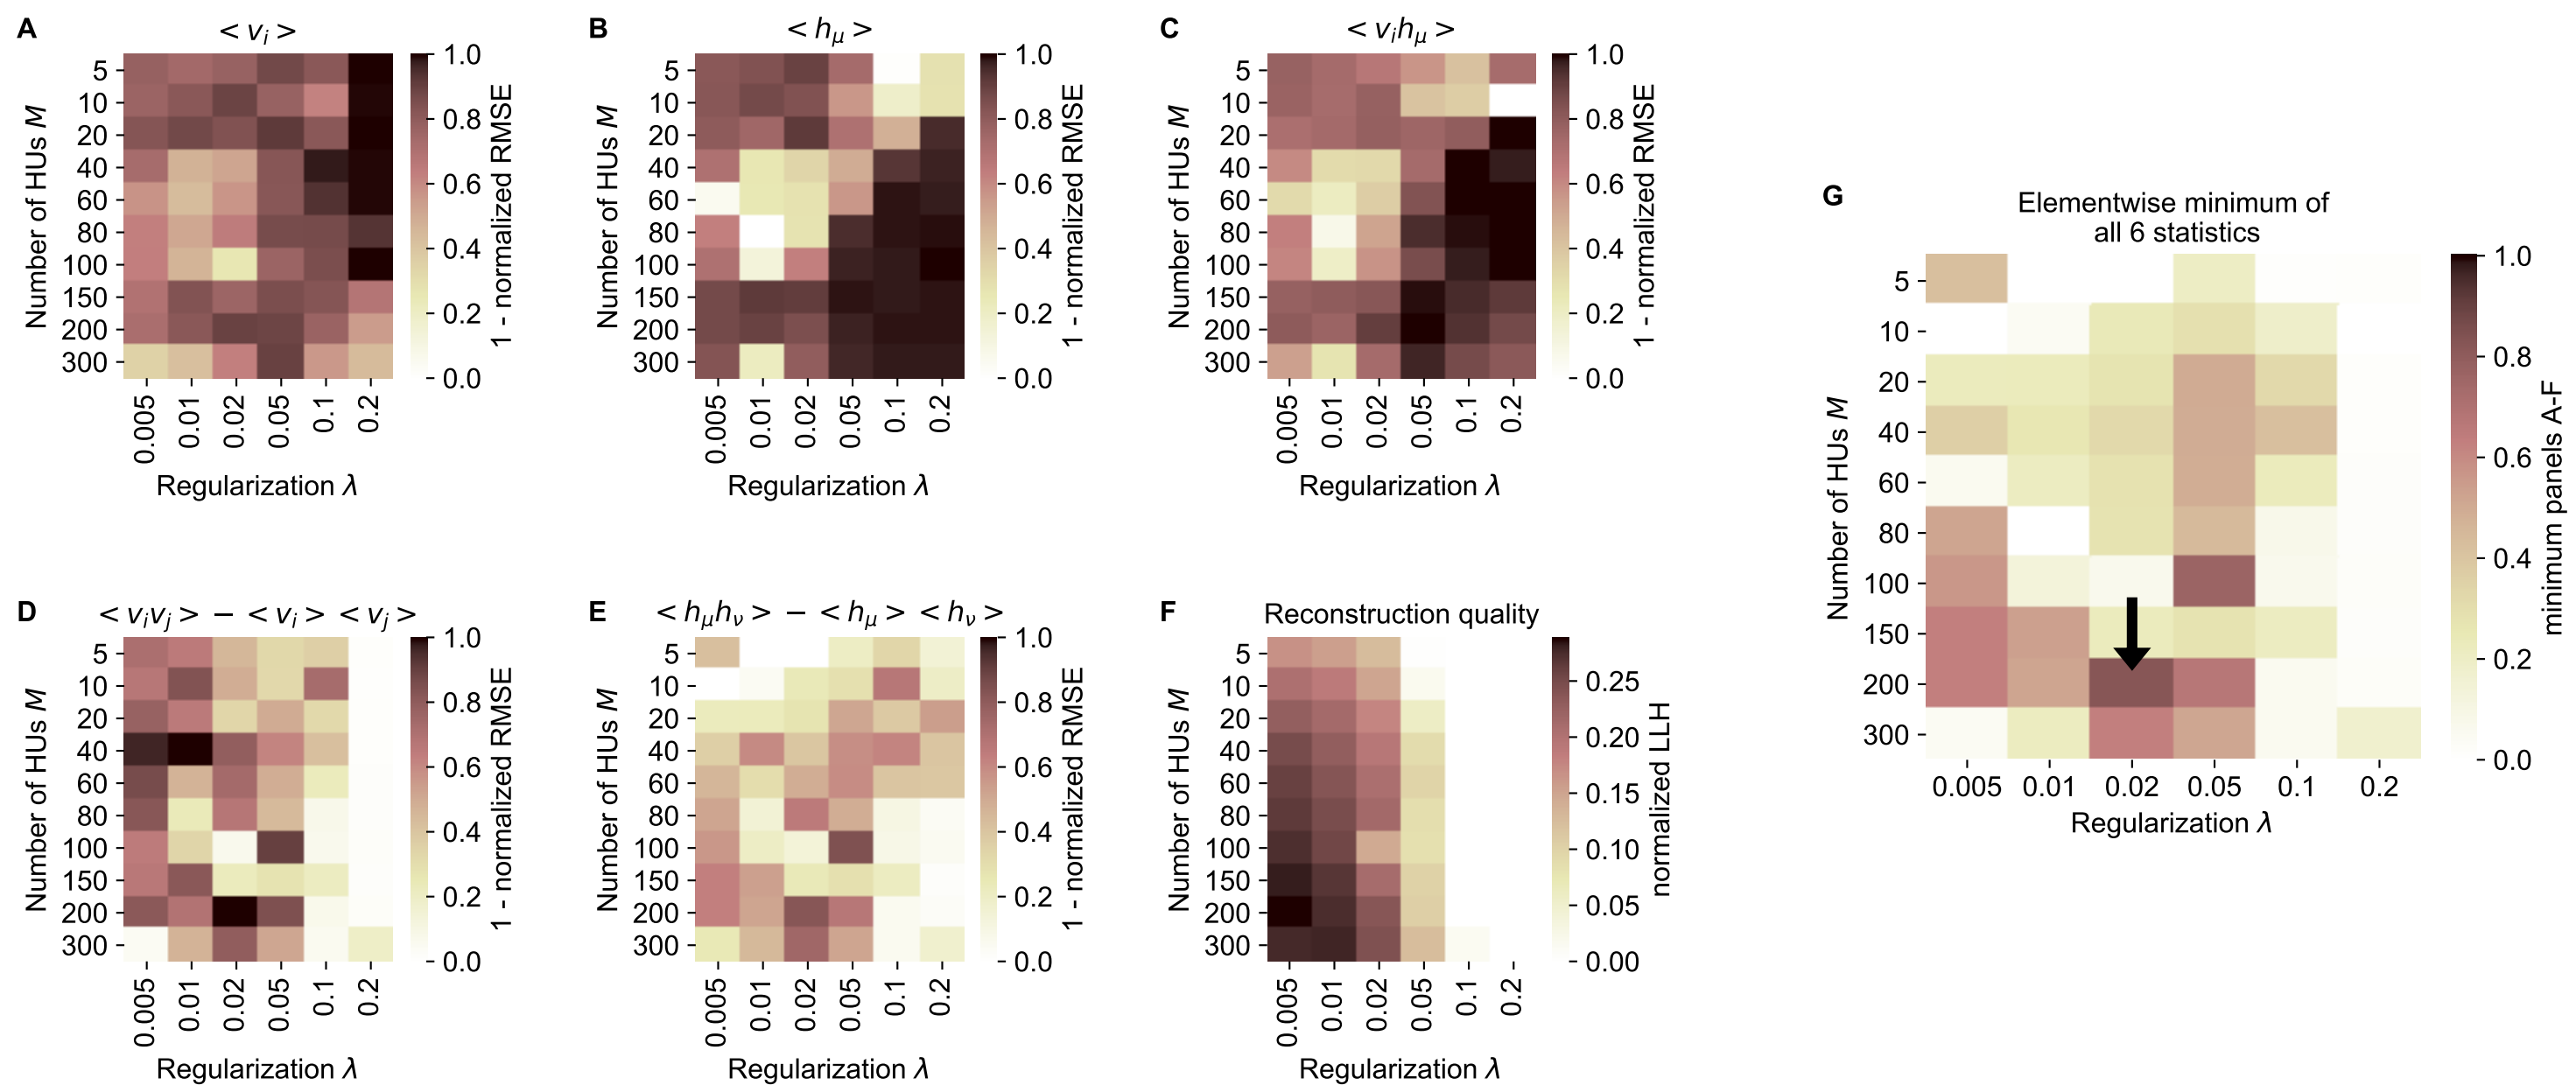

Supplement: supp [file elife-83139-supp-v1.zip › elife_poa_e83139_Figure_2_figure_supplement_1.pdf]

**A Generalized Linear Model (GLM)**

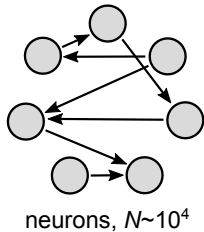

**B Optimize  $L_2$  sparsity regularization of GLM**

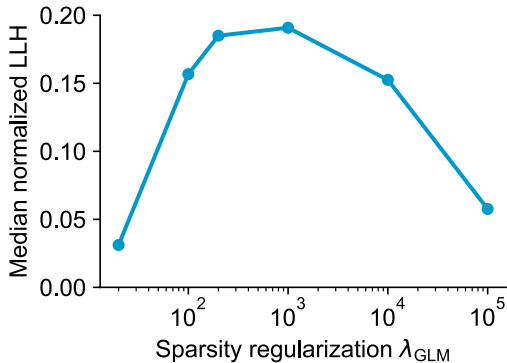

Supplement: supp [file elife-83139-supp-v1.zip › elife_poa_e83139_Figure_2_figure_supplement_2.pdf]

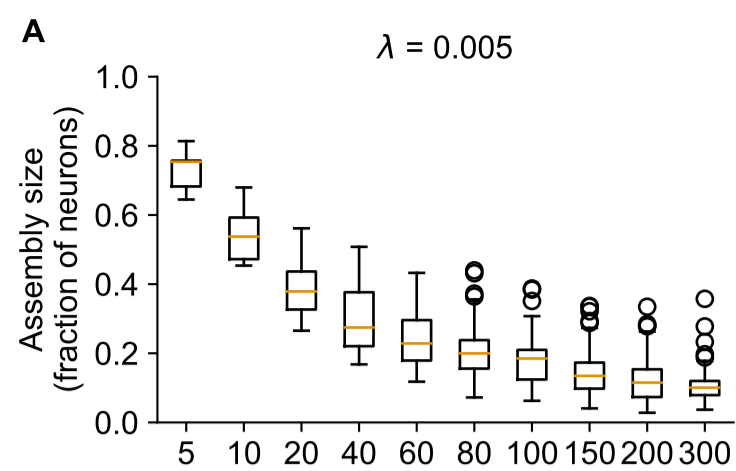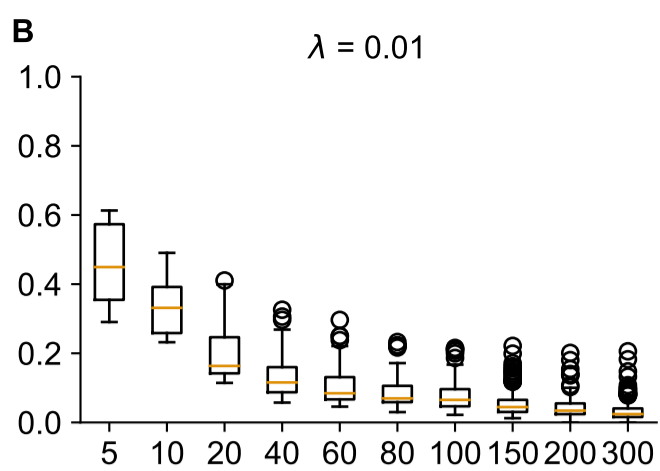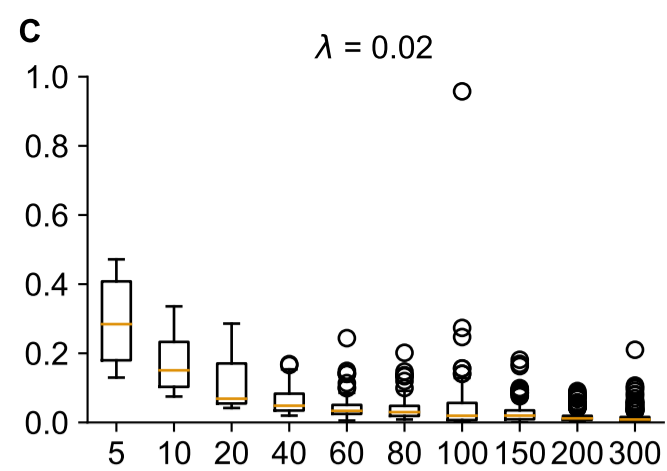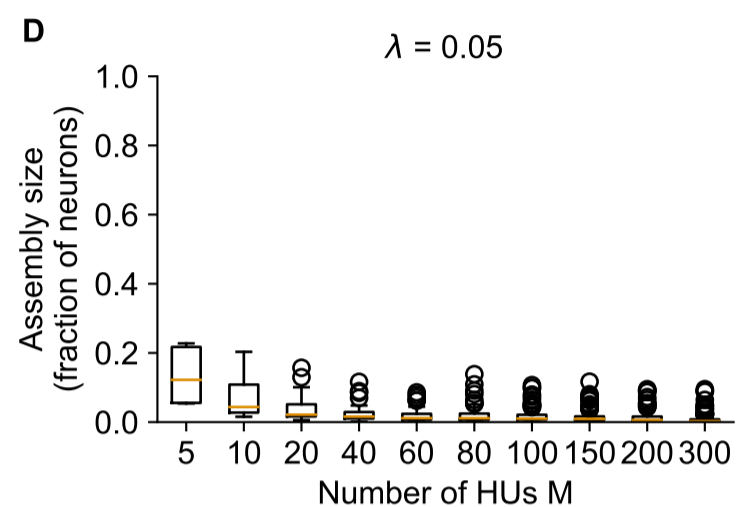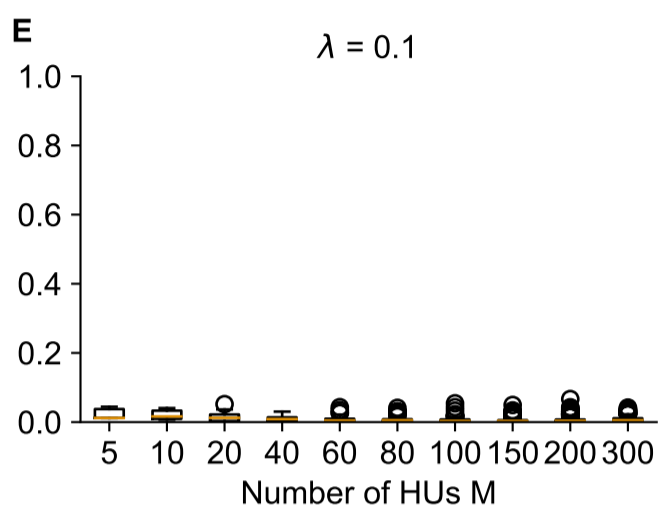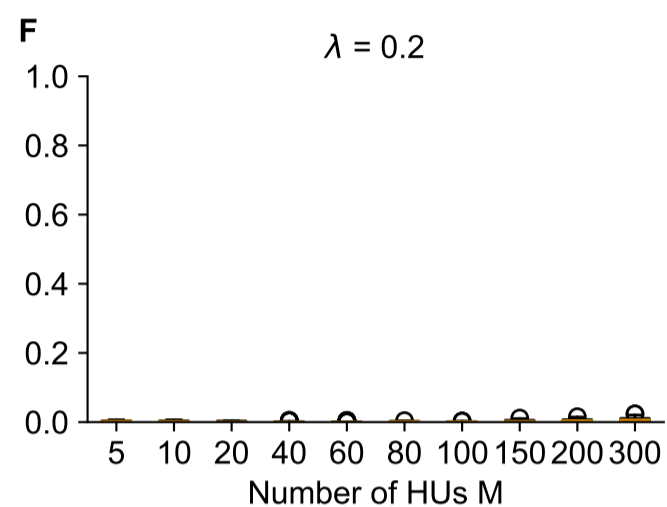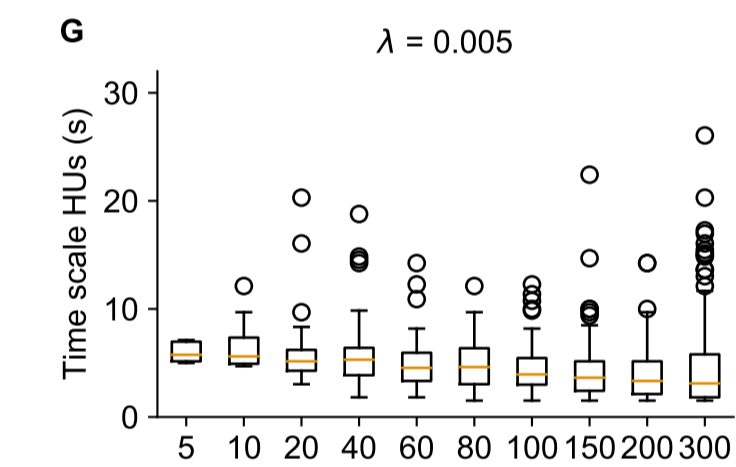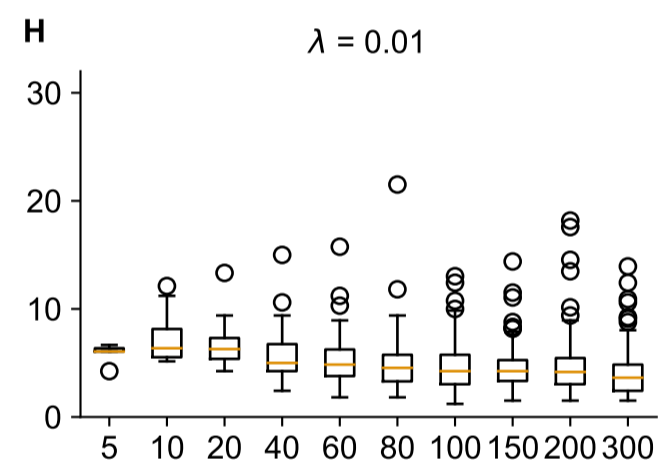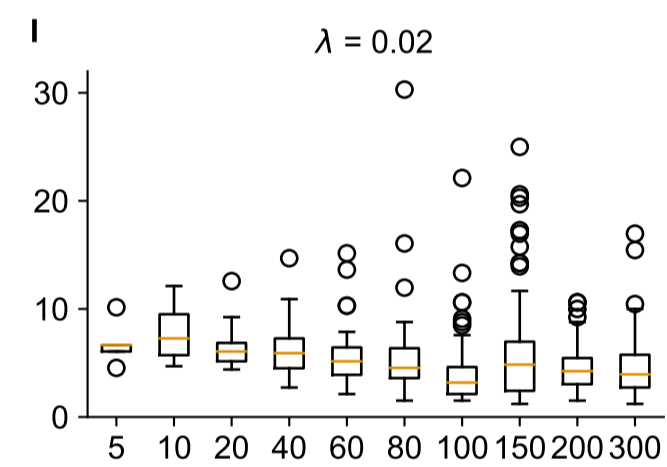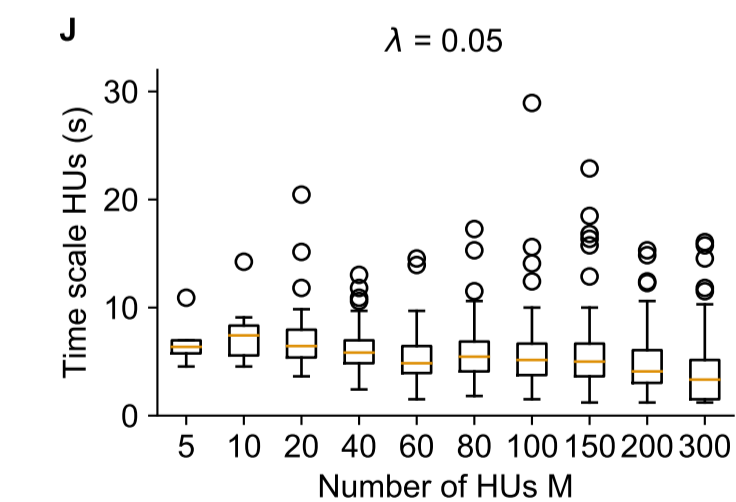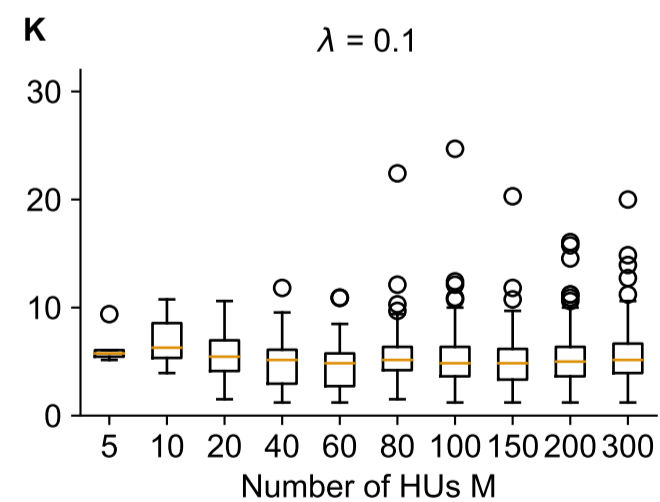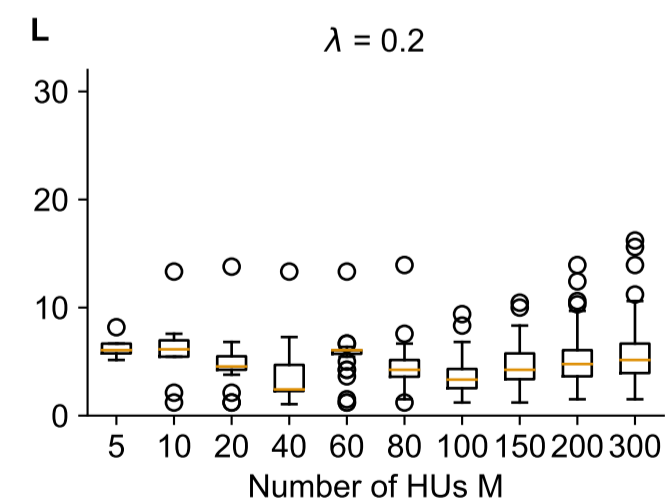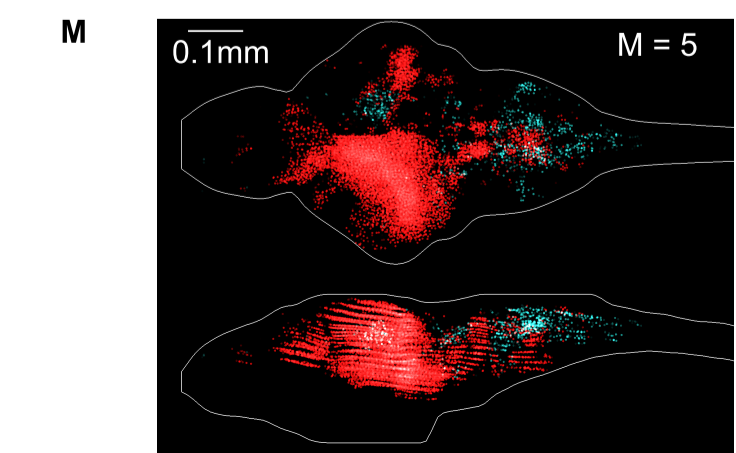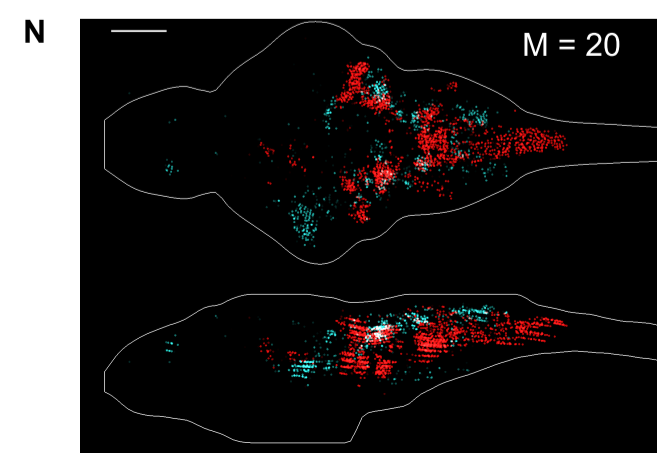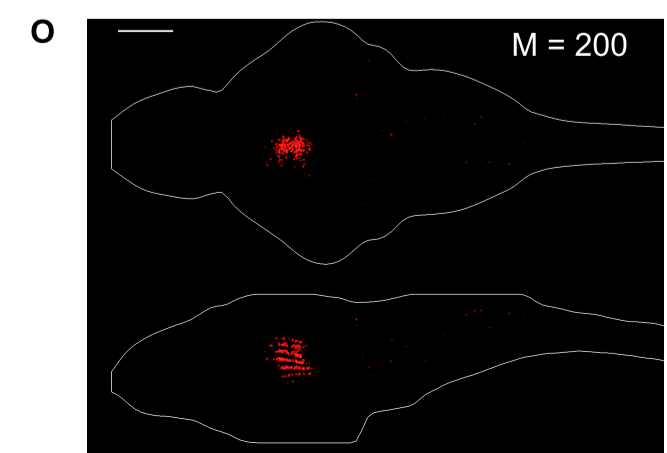

Supplement: supp [file elife-83139-supp-v1.zip › elife_poa_e83139_Figure_2_figure_supplement_5.pdf]

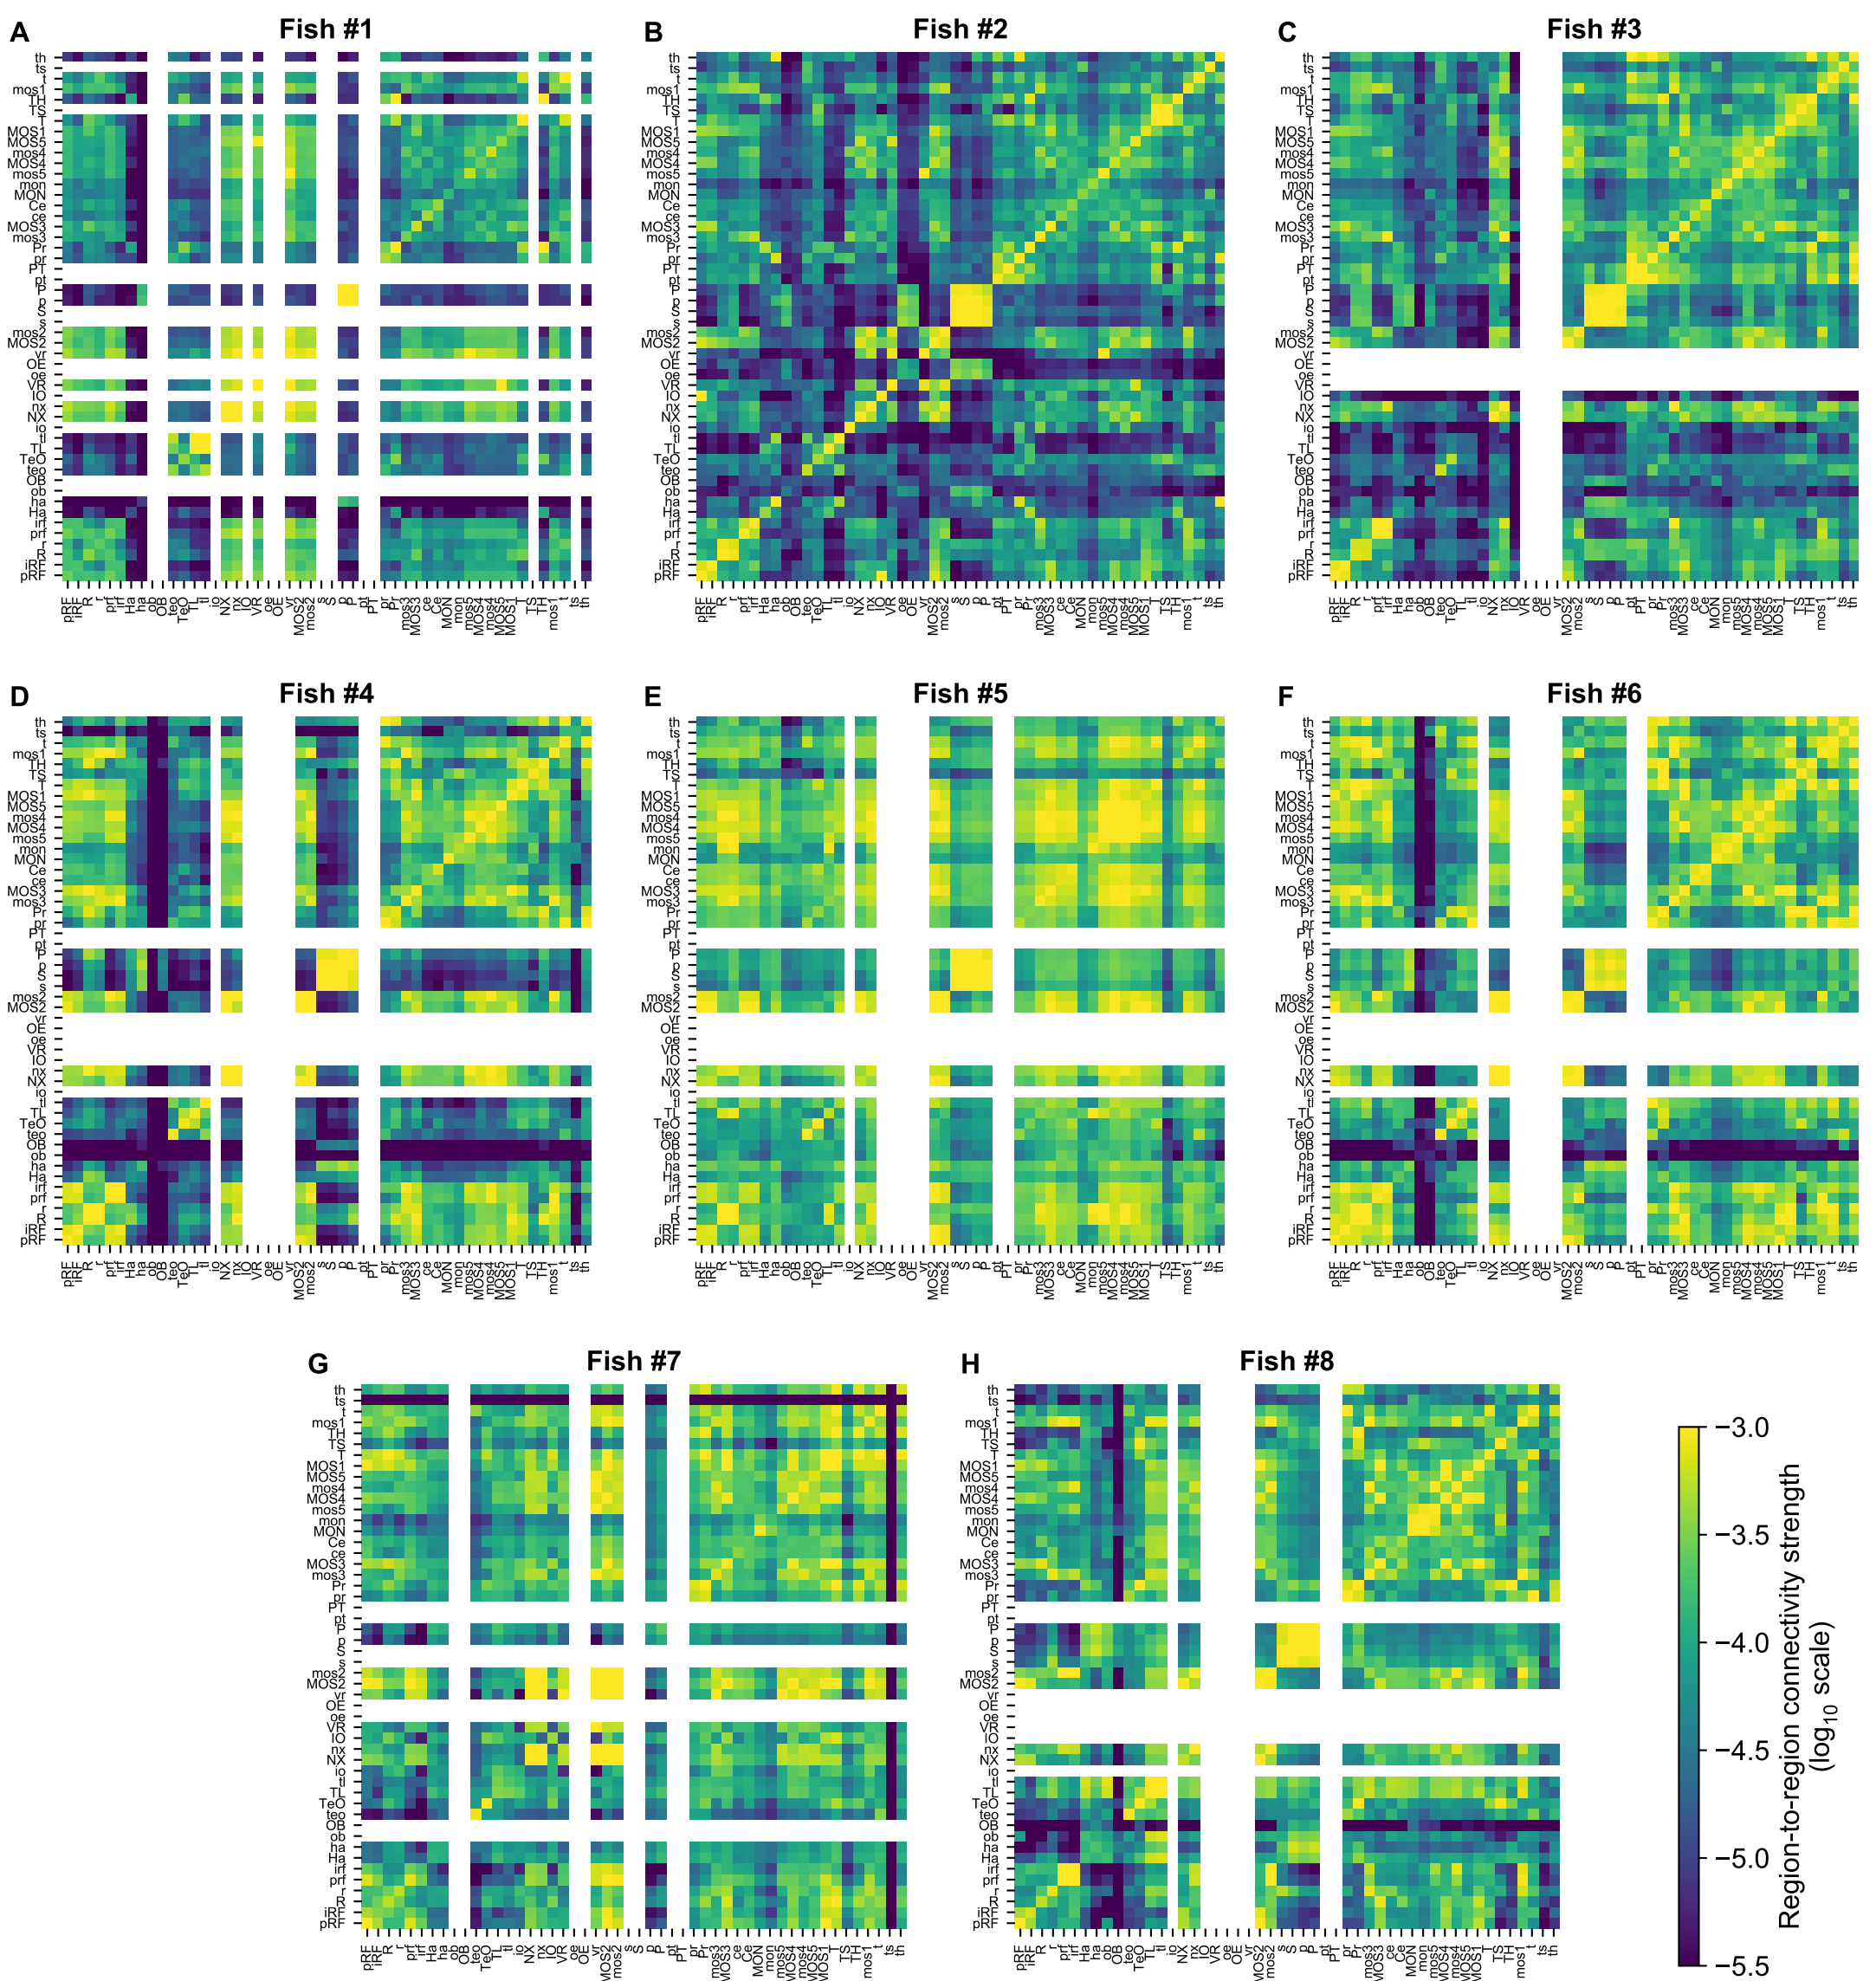

Supplement: supp [file elife-83139-supp-v1.zip › elife_poa_e83139_Figure_5_figure_supplement_1.pdf]
